# Supplementary material for: Prevalence of HCV genotypes and subtypes in Southeast Asia: A systematic review and meta-analysis
Source: PubMed Central journal article supplement (PMC8136688; doi:10.1371/journal.pone.0251673), 2021-05-20
Supplement: pone.0251673.s001.pdf [file pone.0251673.s001.pdf]

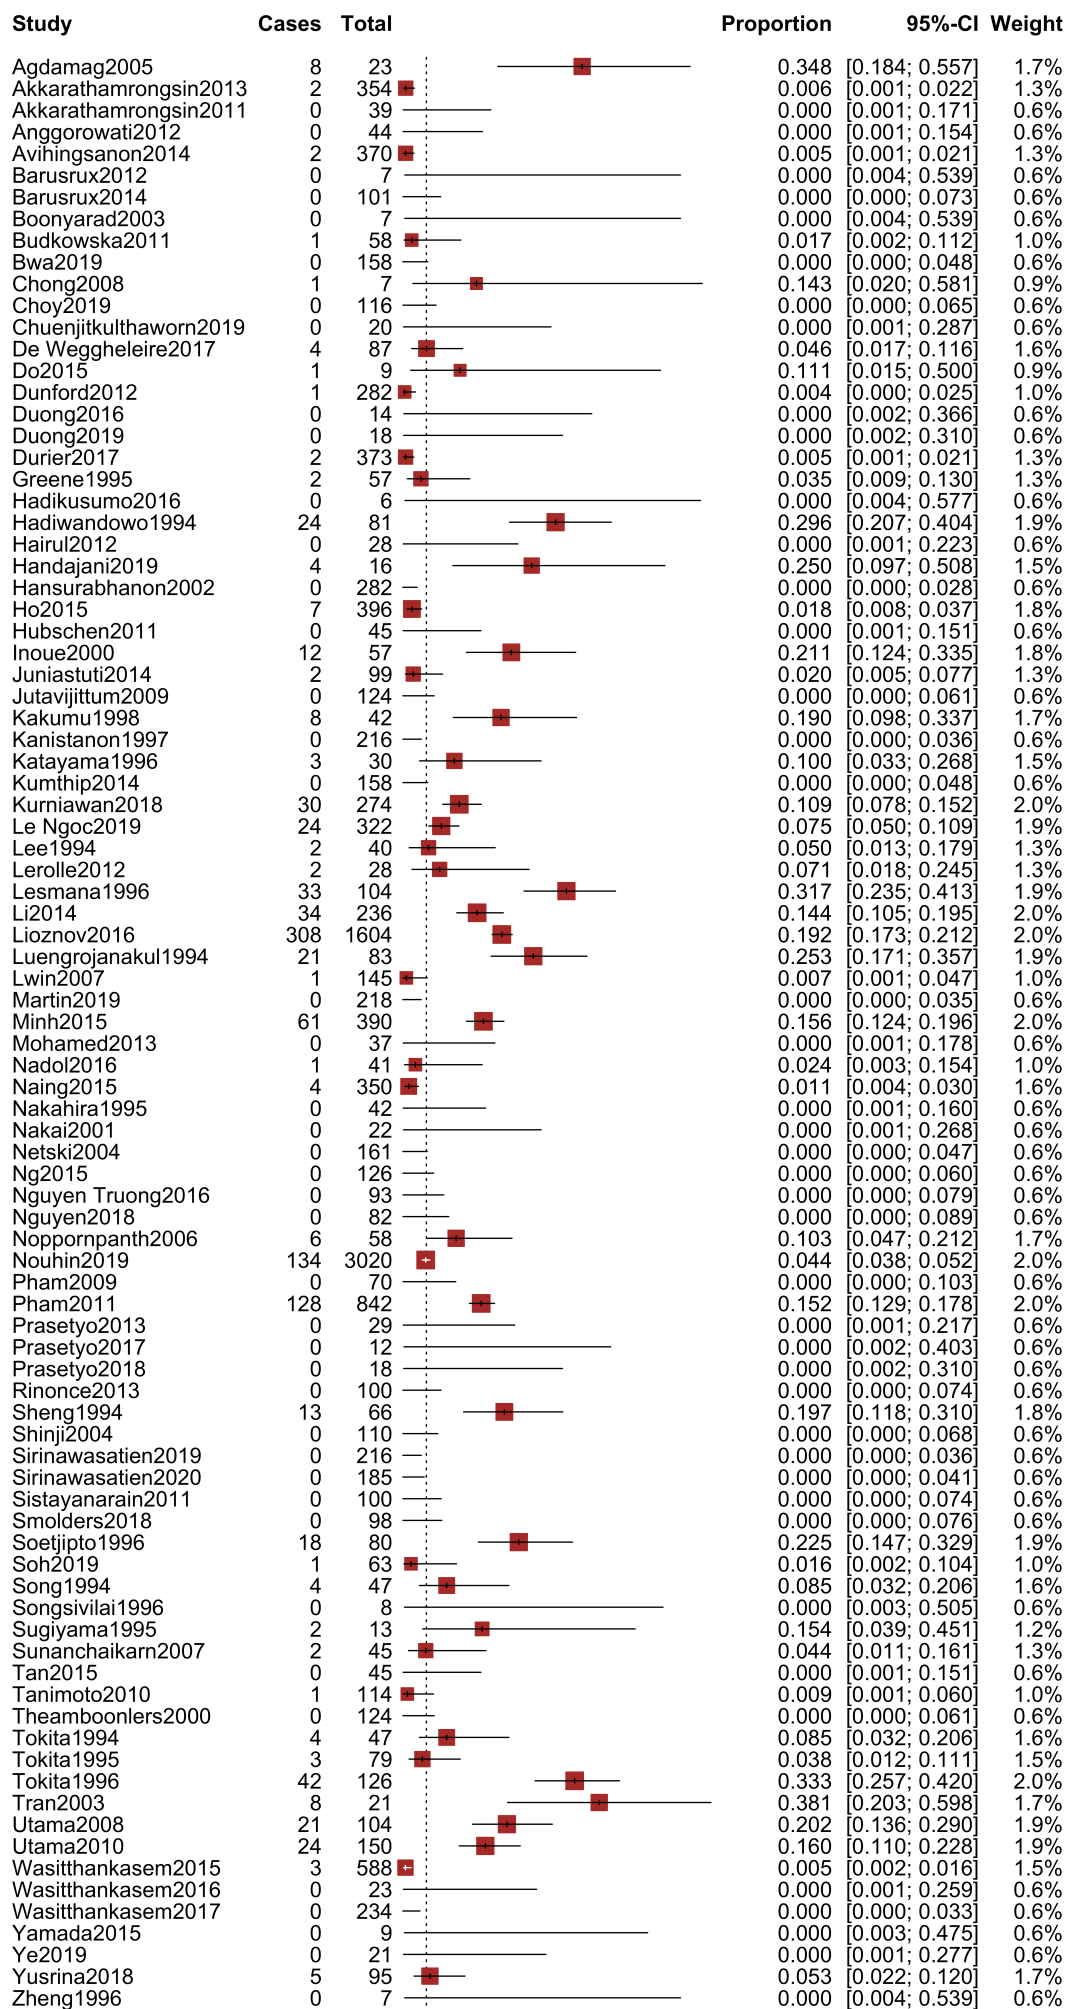

Random effects model 15089  0.046 [0.035; 0.059] 100.0%  
Heterogeneity:  $I^2 = 89\%$ ,  $\tau^2 = 0.9281$ ,  $p < 0.01$   
0.1 0.2 0.3 0.4 0.5  
Logit Proportion
