# Supplementary material for: Prevalence of HCV genotypes and subtypes in Southeast Asia: A systematic review and meta-analysis
Source: PubMed Central journal article supplement (PMC8136688; doi:10.1371/journal.pone.0251673), 2021-05-20
Supplement: pone.0251673.s003.pdf [file pone.0251673.s003.pdf]

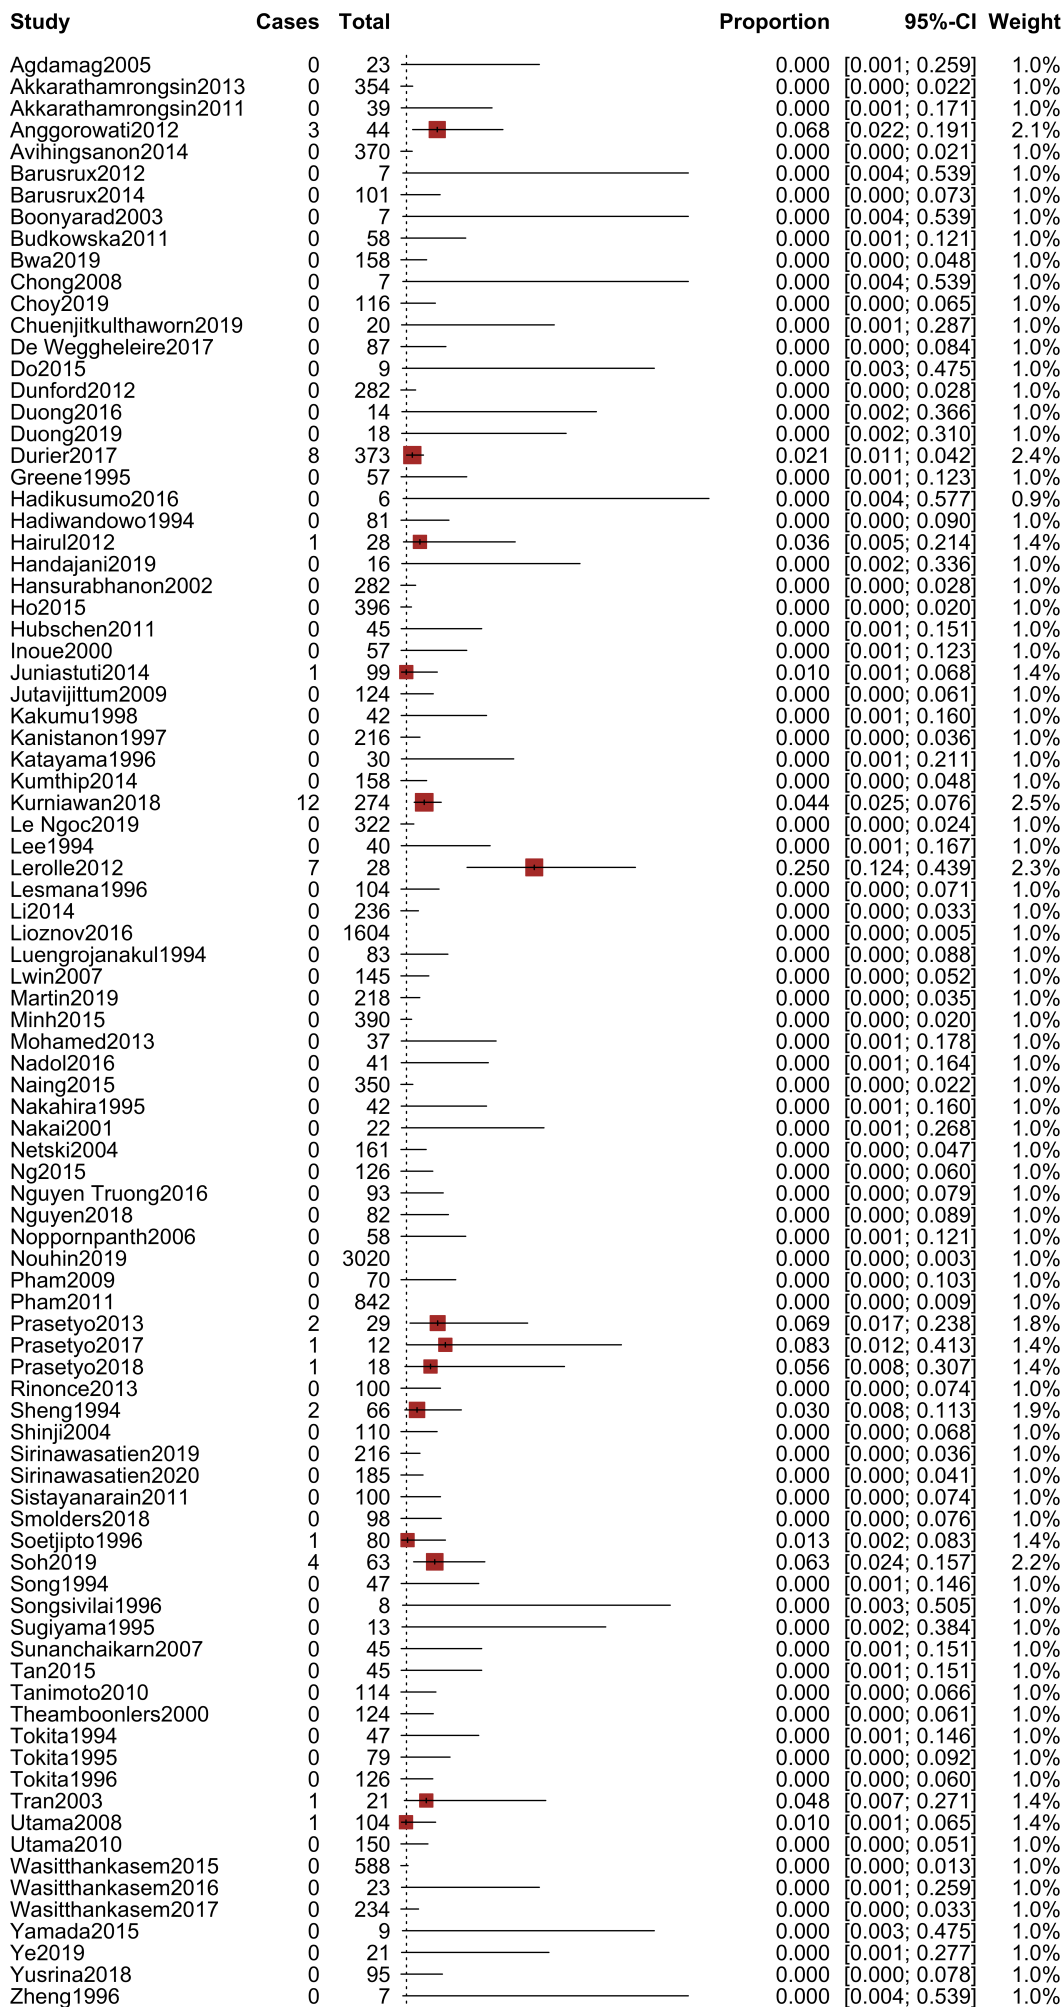

Random effects model, 15089, Heterogeneity:  $I^2 = 50\%$ ,  $\tau^2 = 1.1709$ ,  $p < 0.01$ , 0.011 [0.007; 0.015] 100.0%
