# Supplementary material for: Prevalence of HCV genotypes and subtypes in Southeast Asia: A systematic review and meta-analysis
Source: PubMed Central journal article supplement (PMC8136688; doi:10.1371/journal.pone.0251673), 2021-05-20
Supplement: pone.0251673.s004.pdf [file pone.0251673.s004.pdf]

| Study                   | Cases | Total | Proportion | 95%-CI         | Weight |
|-------------------------|-------|-------|------------|----------------|--------|
| Agdamag2005             | 0     | 23    | 0.000      | [0.001; 0.259] | 1.1%   |
| Akkarathamrongsin2013   | 0     | 354   | 0.000      | [0.000; 0.022] | 1.1%   |
| Akkarathamrongsin2011   | 0     | 39    | 0.000      | [0.001; 0.171] | 1.1%   |
| Anggorowati2012         | 0     | 44    | 0.000      | [0.001; 0.154] | 1.1%   |
| Avihingsanon2014        | 1     | 370   | 0.003      | [0.000; 0.019] | 1.3%   |
| Barusrux2012            | 0     | 7     | 0.000      | [0.004; 0.539] | 1.1%   |
| Barusrux2014            | 0     | 101   | 0.000      | [0.000; 0.073] | 1.1%   |
| Boonyarad2003           | 0     | 7     | 0.000      | [0.004; 0.539] | 1.1%   |
| Budkowska2011           | 0     | 58    | 0.000      | [0.001; 0.121] | 1.1%   |
| Bwa2019                 | 0     | 158   | 0.000      | [0.000; 0.048] | 1.1%   |
| Chong2008               | 0     | 7     | 0.000      | [0.004; 0.539] | 1.1%   |
| Choy2019                | 0     | 116   | 0.000      | [0.000; 0.065] | 1.1%   |
| Chuenjittkulthaworn2019 | 0     | 20    | 0.000      | [0.001; 0.287] | 1.1%   |
| De Weggheleire2017      | 0     | 87    | 0.000      | [0.000; 0.084] | 1.1%   |
| Do2015                  | 0     | 9     | 0.000      | [0.003; 0.475] | 1.1%   |
| Dunford2012             | 0     | 282   | 0.000      | [0.000; 0.028] | 1.1%   |
| Duong2016               | 0     | 14    | 0.000      | [0.002; 0.366] | 1.1%   |
| Duong2019               | 0     | 18    | 0.000      | [0.002; 0.310] | 1.1%   |
| Durier2017              | 0     | 373   | 0.000      | [0.000; 0.021] | 1.1%   |
| Greene 1995             | 0     | 57    | 0.000      | [0.001; 0.123] | 1.1%   |
| Hadikusumo2016          | 0     | 6     | 0.000      | [0.004; 0.577] | 1.1%   |
| Hadiwandowo1994         | 1     | 81    | 0.012      | [0.002; 0.082] | 1.3%   |
| Hairul2012              | 0     | 28    | 0.000      | [0.001; 0.223] | 1.1%   |
| Handajani2019           | 0     | 16    | 0.000      | [0.002; 0.336] | 1.1%   |
| Hansurabhanon2002       | 0     | 282   | 0.000      | [0.000; 0.028] | 1.1%   |
| Ho2015                  | 0     | 396   | 0.000      | [0.000; 0.020] | 1.1%   |
| Hubschen2011            | 0     | 45    | 0.000      | [0.001; 0.151] | 1.1%   |
| Inoue2000               | 0     | 57    | 0.000      | [0.001; 0.123] | 1.1%   |
| Juniastuti2014          | 0     | 99    | 0.000      | [0.000; 0.075] | 1.1%   |
| Jutavijittum2009        | 0     | 124   | 0.000      | [0.000; 0.061] | 1.1%   |
| Kakumu1998              | 0     | 42    | 0.000      | [0.001; 0.160] | 1.1%   |
| Kanistanon1997          | 0     | 216   | 0.000      | [0.000; 0.036] | 1.1%   |
| Katayama1996            | 0     | 30    | 0.000      | [0.001; 0.211] | 1.1%   |
| Kumthip2014             | 0     | 158   | 0.000      | [0.000; 0.048] | 1.1%   |
| Kurniawan2018           | 0     | 274   | 0.000      | [0.000; 0.028] | 1.1%   |
| Le Ngoc2019             | 0     | 322   | 0.000      | [0.000; 0.024] | 1.1%   |
| Lee1994                 | 0     | 40    | 0.000      | [0.001; 0.167] | 1.1%   |
| Lerolle2012             | 0     | 28    | 0.000      | [0.001; 0.223] | 1.1%   |
| Lesmana 1996            | 0     | 104   | 0.000      | [0.000; 0.071] | 1.1%   |
| Li2014                  | 0     | 236   | 0.000      | [0.000; 0.033] | 1.1%   |
| Lioznov2016             | 0     | 1604  | 0.000      | [0.000; 0.005] | 1.1%   |
| Luengrojanakul1994      | 43    | 83    | 0.518      | [0.411; 0.623] | 1.5%   |
| Lwin2007                | 0     | 145   | 0.000      | [0.000; 0.052] | 1.1%   |
| Martin2019              | 0     | 218   | 0.000      | [0.000; 0.035] | 1.1%   |
| Minh2015                | 0     | 390   | 0.000      | [0.000; 0.020] | 1.1%   |
| Mohamed2013             | 0     | 37    | 0.000      | [0.001; 0.178] | 1.1%   |
| Nadol2016               | 0     | 41    | 0.000      | [0.001; 0.164] | 1.1%   |
| Naing2015               | 0     | 350   | 0.000      | [0.000; 0.022] | 1.1%   |
| Nakahira1995            | 0     | 42    | 0.000      | [0.001; 0.160] | 1.1%   |
| Nakai2001               | 0     | 22    | 0.000      | [0.001; 0.268] | 1.1%   |
| Netski2004              | 0     | 161   | 0.000      | [0.000; 0.047] | 1.1%   |
| Ng2015                  | 0     | 126   | 0.000      | [0.000; 0.060] | 1.1%   |
| Nguyen Truong2016       | 0     | 93    | 0.000      | [0.000; 0.079] | 1.1%   |
| Nguyen2018              | 0     | 82    | 0.000      | [0.000; 0.089] | 1.1%   |
| Noppornpanth2006        | 0     | 58    | 0.000      | [0.001; 0.121] | 1.1%   |
| Nouhin2019              | 0     | 3020  | 0.000      | [0.000; 0.003] | 1.1%   |
| Pham2009                | 0     | 70    | 0.000      | [0.000; 0.103] | 1.1%   |
| Pham2011                | 0     | 842   | 0.000      | [0.000; 0.009] | 1.1%   |
| Prasetyo2013            | 0     | 29    | 0.000      | [0.001; 0.217] | 1.1%   |
| Prasetyo2017            | 0     | 12    | 0.000      | [0.002; 0.403] | 1.1%   |
| Prasetyo2018            | 0     | 18    | 0.000      | [0.002; 0.310] | 1.1%   |
| Rinonce2013             | 0     | 100   | 0.000      | [0.000; 0.074] | 1.1%   |
| Sheng1994               | 0     | 66    | 0.000      | [0.000; 0.108] | 1.1%   |
| Shinji2004              | 0     | 110   | 0.000      | [0.000; 0.068] | 1.1%   |
| Sirinawasatien2019      | 0     | 216   | 0.000      | [0.000; 0.036] | 1.1%   |
| Sirinawasatien2020      | 0     | 185   | 0.000      | [0.000; 0.041] | 1.1%   |
| Sistayanarain2011       | 0     | 100   | 0.000      | [0.000; 0.074] | 1.1%   |
| Smolders2018            | 0     | 98    | 0.000      | [0.000; 0.076] | 1.1%   |
| Soetjipto 1996          | 0     | 80    | 0.000      | [0.000; 0.091] | 1.1%   |
| Soh2019                 | 0     | 63    | 0.000      | [0.000; 0.113] | 1.1%   |
| Song1994                | 0     | 47    | 0.000      | [0.001; 0.146] | 1.1%   |
| Songsivilai1996         | 0     | 8     | 0.000      | [0.003; 0.505] | 1.1%   |
| Sugiyama1995            | 0     | 13    | 0.000      | [0.002; 0.384] | 1.1%   |
| Sunanchaikarn2007       | 0     | 45    | 0.000      | [0.001; 0.151] | 1.1%   |
| Tan2015                 | 0     | 45    | 0.000      | [0.001; 0.151] | 1.1%   |
| Tanimoto2010            | 0     | 114   | 0.000      | [0.000; 0.066] | 1.1%   |
| Theamboonlers2000       | 0     | 124   | 0.000      | [0.000; 0.061] | 1.1%   |
| Tokita1994              | 0     | 47    | 0.000      | [0.001; 0.146] | 1.1%   |
| Tokita1995              | 0     | 79    | 0.000      | [0.000; 0.092] | 1.1%   |
| Tokita1996              | 0     | 126   | 0.000      | [0.000; 0.060] | 1.1%   |
| Tran2003                | 0     | 21    | 0.000      | [0.001; 0.277] | 1.1%   |
| Utama2008               | 0     | 104   | 0.000      | [0.000; 0.071] | 1.1%   |
| Utama2010               | 0     | 150   | 0.000      | [0.000; 0.051] | 1.1%   |
| Wasitthankasem2015      | 0     | 588   | 0.000      | [0.000; 0.013] | 1.1%   |
| Wasitthankasem2016      | 0     | 23    | 0.000      | [0.001; 0.259] | 1.1%   |
| Wasitthankasem2017      | 0     | 234   | 0.000      | [0.000; 0.033] | 1.1%   |
| Yamada2015              | 0     | 9     | 0.000      | [0.003; 0.475] | 1.1%   |
| Ye2019                  | 0     | 21    | 0.000      | [0.001; 0.277] | 1.1%   |
| Yusrina2018             | 0     | 95    | 0.000      | [0.000; 0.078] | 1.1%   |
| Zheng1996               | 0     | 7     | 0.000      | [0.004; 0.539] | 1.1%   |

Random effects model 15089  
Heterogeneity:  $I^2 = 79\%$ ,  $\tau^2 = 5.7898$ ,  $p < 0.01$  0.008 [0.004; 0.013] 100.0%  
0.1 0.2 0.3 0.4 0.5 0.6  
Logit Proportion
