# Supplementary material for: Prevalence of HCV genotypes and subtypes in Southeast Asia: A systematic review and meta-analysis
Source: PubMed Central journal article supplement (PMC8136688; doi:10.1371/journal.pone.0251673), 2021-05-20
Supplement: pone.0251673.s005.pdf [file pone.0251673.s005.pdf]

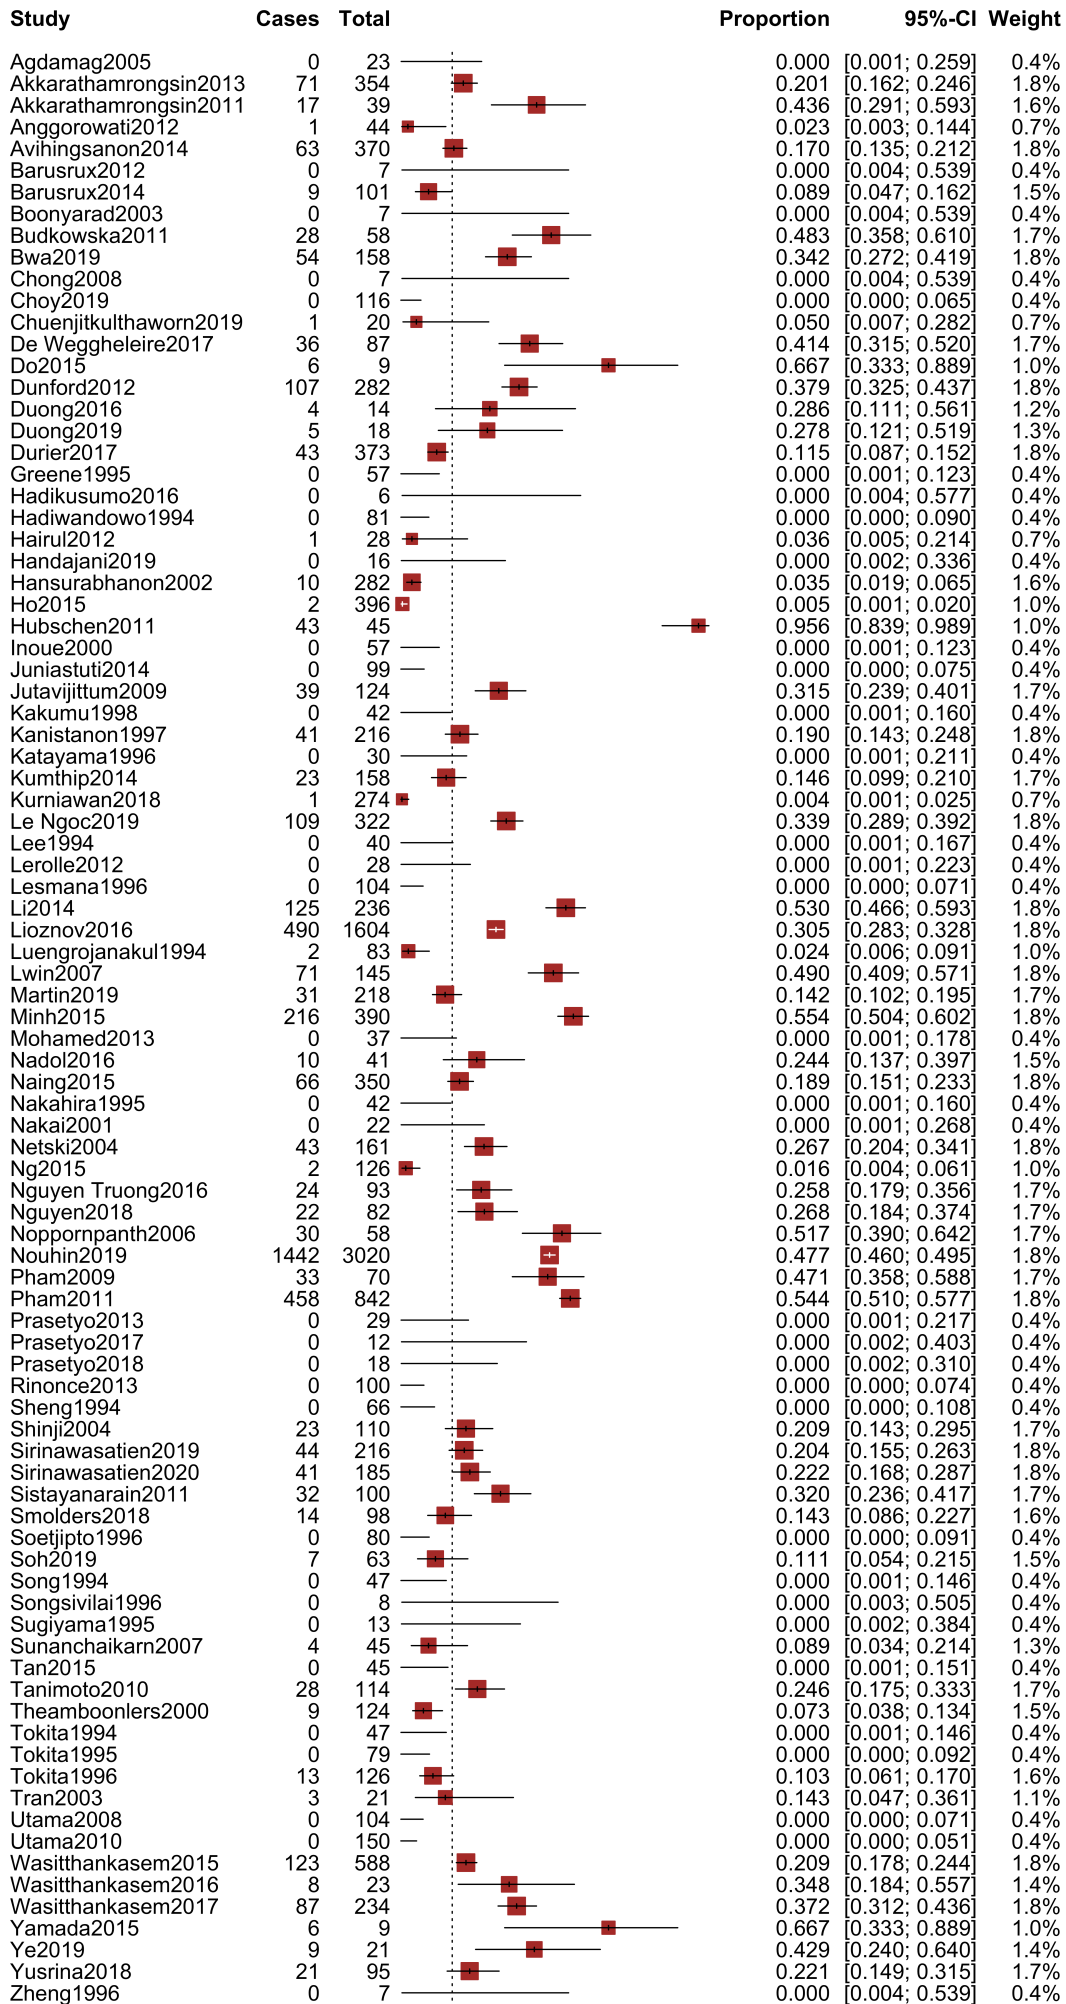

**Random effects model** 15089  
Heterogeneity:  $I^2 = 94\%$ ,  $\tau^2 = 0.6255$ ,  $p < 0.01$  **0.165 [0.138; 0.196] 100.0%**

0.2 0.4 0.6 0.8  
Logit Proportion
