# Supplementary material for: Prevalence of HCV genotypes and subtypes in Southeast Asia: A systematic review and meta-analysis
Source: PubMed Central journal article supplement (PMC8136688; doi:10.1371/journal.pone.0251673), 2021-05-20

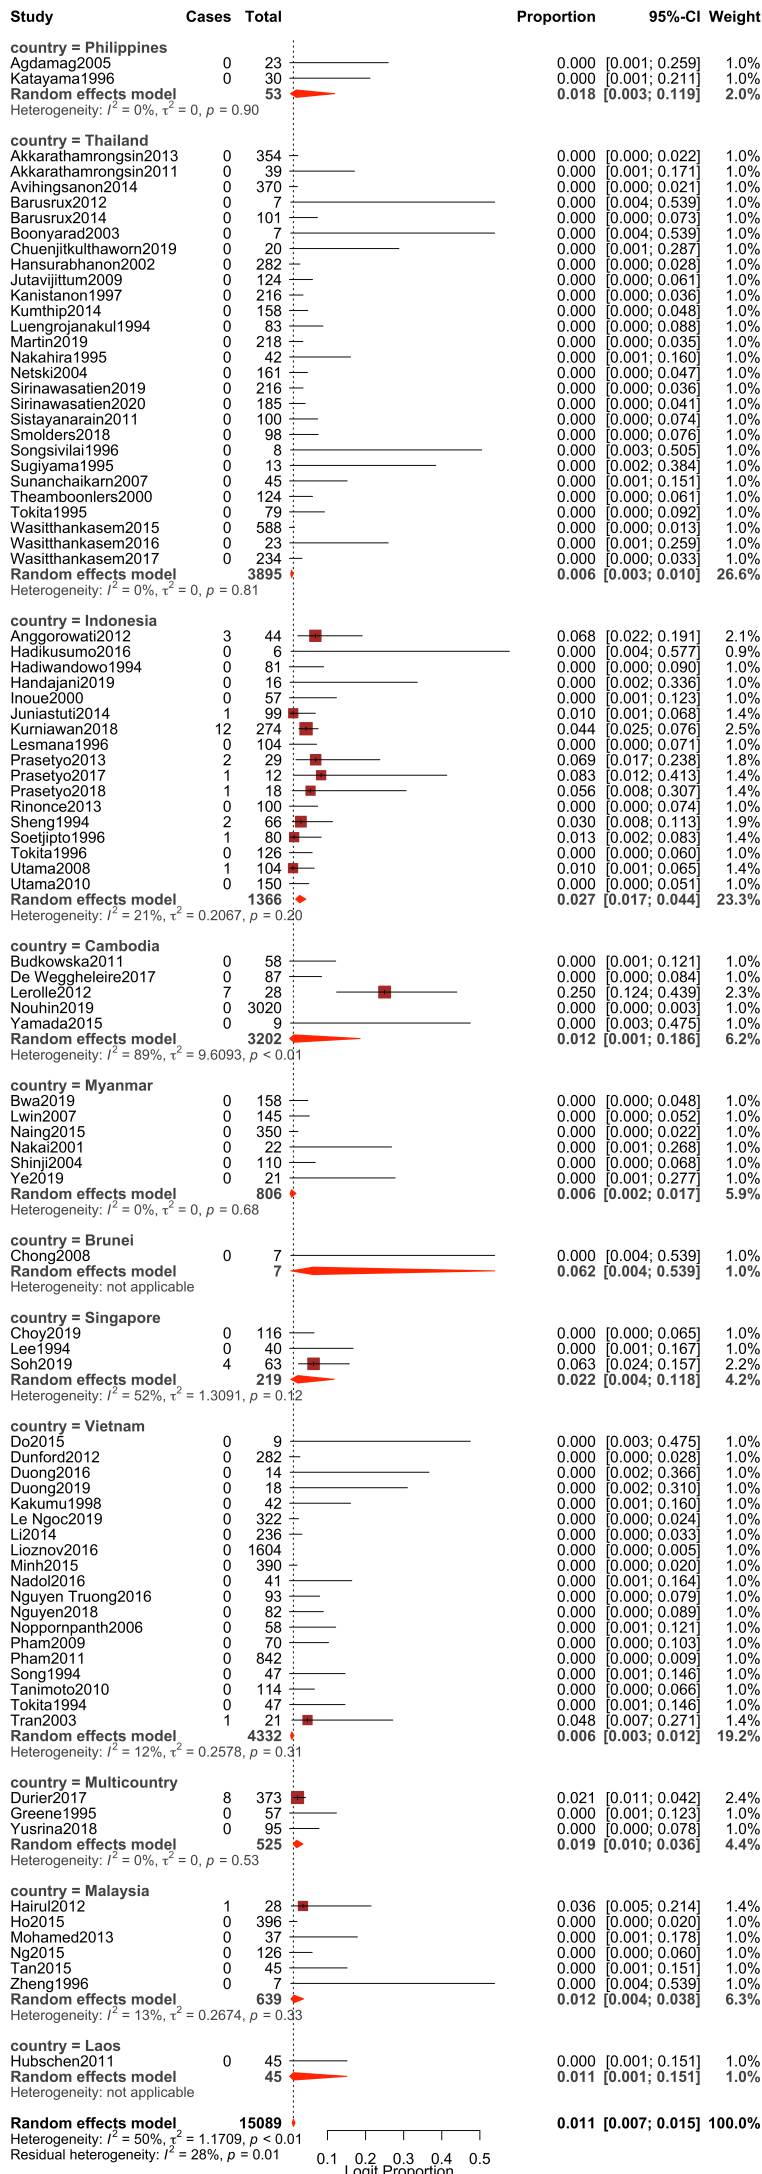

Supplement: pone.0251673.s014.pdf [file pone.0251673.s014.pdf]
