# Supplementary material for: Prevalence of HCV genotypes and subtypes in Southeast Asia: A systematic review and meta-analysis
Source: PubMed Central journal article supplement (PMC8136688; doi:10.1371/journal.pone.0251673), 2021-05-20
Supplement: pone.0251673.s015.pdf [file pone.0251673.s015.pdf]

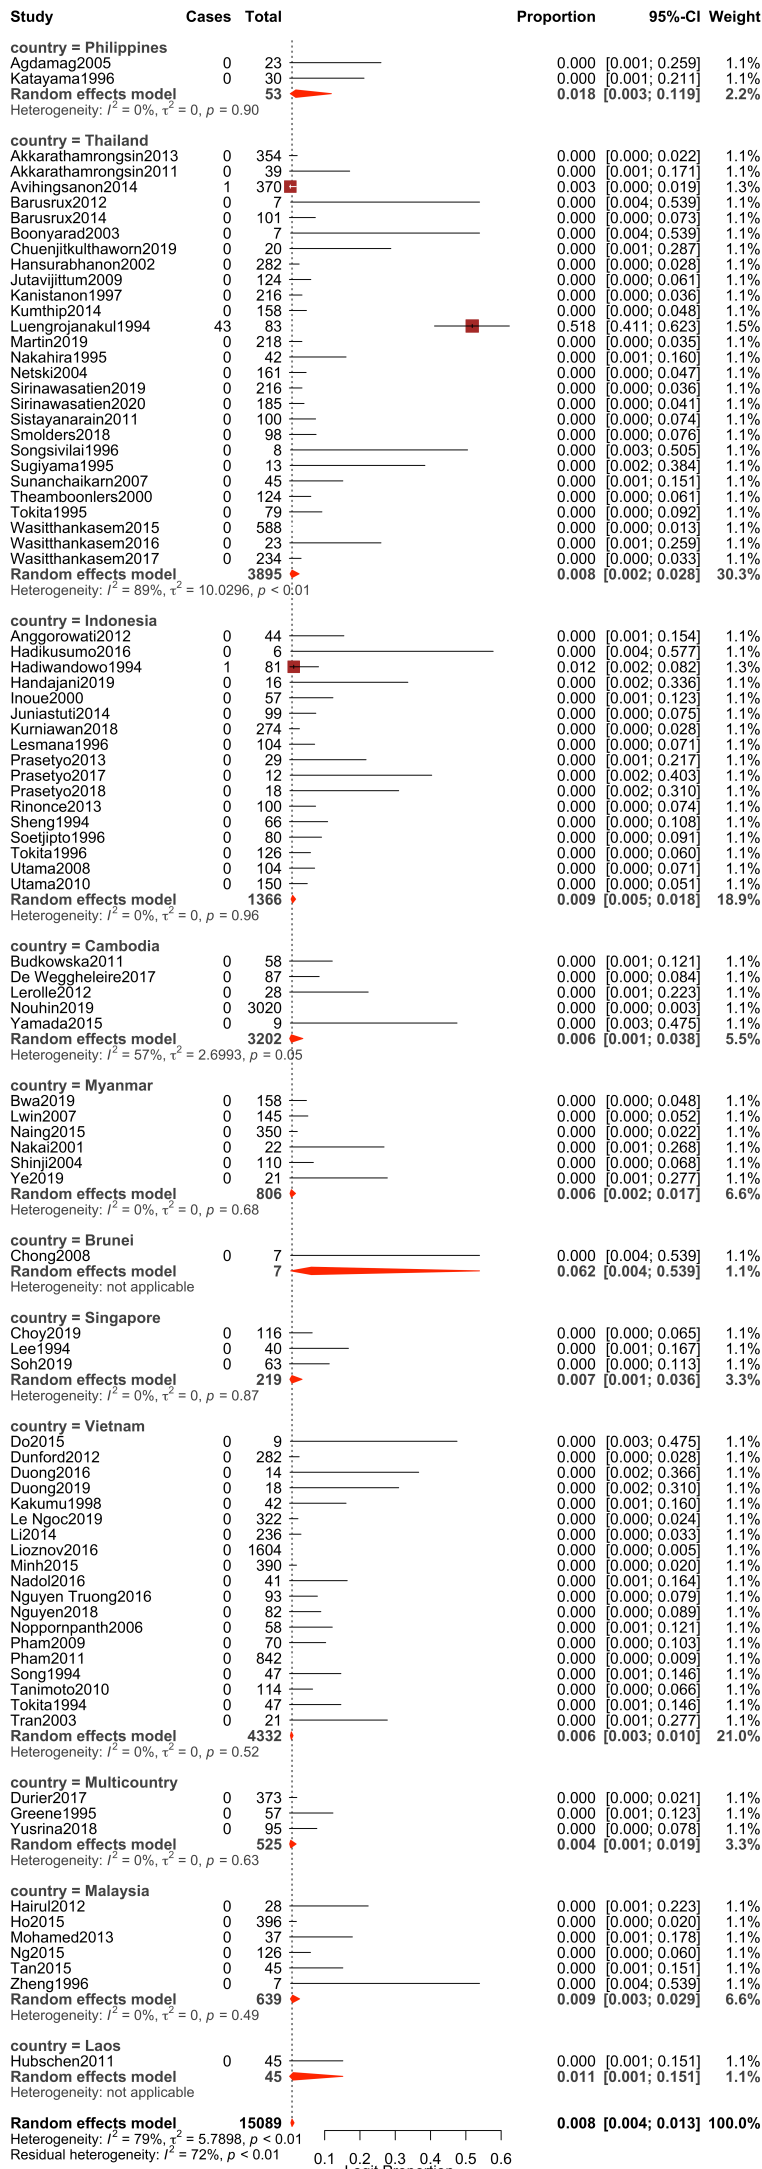

0.1 0.2 0.3 0.4 0.5 0.6  
Logit Proportion
