# Supplementary material for: Prevalence of HCV genotypes and subtypes in Southeast Asia: A systematic review and meta-analysis
Source: PubMed Central journal article supplement (PMC8136688; doi:10.1371/journal.pone.0251673), 2021-05-20
Supplement: pone.0251673.s017.pdf [file pone.0251673.s017.pdf]

|    |                            |     |         |     |     |     |     |     |     |     |   |
|----|----------------------------|-----|---------|-----|-----|-----|-----|-----|-----|-----|---|
| 63 | Smolders et al., 2018      | Yes | No      | Yes | Yes | Yes | Yes | Yes | Yes | Yes | 8 |
| 64 | Songsivilai et al., 1996   | Yes | No      | Yes | Yes | Yes | Yes | Yes | Yes | Yes | 8 |
| 65 | Sugiyama et al., 1995      | Yes | No      | Yes | Yes | Yes | Yes | Yes | Yes | Yes | 8 |
| 66 | Sunanchaikarn et al., 2007 | Yes | No      | Yes | Yes | Yes | Yes | Yes | Yes | Yes | 8 |
| 67 | Theamboonlers et al., 2000 | Yes | No      | Yes | Yes | Yes | Yes | Yes | Yes | Yes | 8 |
| 68 | Tokita et al., 1995        | Yes | No      | Yes | Yes | Yes | Yes | Yes | Yes | Yes | 8 |
| 69 | Wasitthanasem et al., 2015 | Yes | No      | Yes | Yes | Yes | Yes | Yes | Yes | Yes | 8 |
| 70 | Wasitthanasem et al., 2016 | Yes | No      | Yes | Yes | Yes | Yes | Yes | Yes | Yes | 8 |
| 71 | Wasitthanasem et al., 2017 | Yes | No      | Yes | Yes | Yes | Yes | Yes | Yes | Yes | 8 |
| 72 | Do et al., 2015            | Yes | Yes     | Yes | Yes | Yes | Yes | Yes | Yes | Yes | 9 |
| 73 | Dunford et al., 2012       | Yes | No      | Yes | Yes | Yes | Yes | Yes | Yes | Yes | 8 |
| 74 | Duong et al., 2016         | Yes | No      | Yes | Yes | Yes | Yes | Yes | Yes | Yes | 8 |
| 75 | Duong et al., 2019         | Yes | No      | Yes | Yes | Yes | Yes | Yes | Yes | Yes | 8 |
| 76 | Kakumu et al., 1998        | Yes | No      | Yes | Yes | Yes | Yes | Yes | Yes | Yes | 8 |
| 77 | Le Ngoc et al., 2019       | Yes | No      | Yes | Yes | Yes | Yes | Yes | Yes | Yes | 8 |
| 78 | Li et al., 2014            | Yes | No      | Yes | Yes | Yes | Yes | Yes | Yes | Yes | 8 |
| 79 | Lioznov et al., 2016       | Yes | No      | Yes | Yes | Yes | Yes | Yes | Yes | Yes | 8 |
| 80 | Minh 2015                  | Yes | Unclear | Yes | Yes | Yes | Yes | Yes | Yes | Yes | 8 |
| 81 | Nadol et al., 2016         | Yes | Yes     | Yes | Yes | Yes | Yes | Yes | Yes | Yes | 9 |
| 82 | Nguyen et al., 2016        | Yes | No      | Yes | Yes | Yes | Yes | Yes | Yes | Yes | 8 |
| 83 | Nguyen et al., 2018        | Yes | Yes     | Yes | Yes | Yes | Yes | Yes | Yes | Yes | 9 |
| 84 | Noppornpanth et al., 2006  | Yes | No      | Yes | Yes | Yes | Yes | Yes | Yes | Yes | 8 |
| 85 | Pham et al., 2009          | Yes | No      | Yes | Yes | Yes | Yes | Yes | Yes | Yes | 8 |
| 86 | Pham et al., 2011          | Yes | No      | Yes | Yes | Yes | Yes | Yes | Yes | Yes | 8 |
| 87 | Song et al., 1994          | Yes | No      | Yes | Yes | Yes | Yes | Yes | Yes | Yes | 8 |
| 88 | Tanimoto et al., 2010      | Yes | No      | Yes | Yes | Yes | Yes | Yes | Yes | Yes | 8 |
| 89 | Tokita et al., 1994        | Yes | No      | Yes | Yes | Yes | Yes | Yes | Yes | Yes | 8 |
| 90 | Tran et al., 2003          | Yes | No      | Yes | Yes | Yes | Yes | Yes | Yes | Yes | 8 |

\* **1.** Appropriate sampling frame to address target population, **2.** Appropriate sampling way of study participants, **3.** Adequate sample size, **4.** Detail description of study participants and settings, **5.** Data analysis with sufficient coverage of identified sample, **6.** Use of valid methods to identify the condition, **7.** Standard, reliable way of measurement of condition for all participants, **8.** Availability of appropriate statistical analysis, **9.** Adequate response rate and management of low response rate
