# Supplementary material for: Prevalence of HCV genotypes and subtypes in Southeast Asia: A systematic review and meta-analysis
Source: PubMed Central journal article supplement (PMC8136688; doi:10.1371/journal.pone.0251673), 2021-05-20
Supplement: pone.0251673.s019.pdf [file pone.0251673.s019.pdf]

## Search strategy

### Pubmed

((("hepatitis c"[Title/Abstract] OR (HCV[Title/Abstract])) AND ((genotype[Title/Abstract] OR (genotypes[Title/Abstract]))) AND (((((((((((Brunei[Title/Abstract] OR (Cambodia[Title/Abstract])) OR ("East Timor"[Title/Abstract])) OR (Timor-Leste[Title/Abstract])) OR (Indonesia[Title/Abstract])) OR (Laos[Title/Abstract])) OR (Malaysia[Title/Abstract])) OR (Myanmar[Title/Abstract])) OR (Philippines[Title/Abstract])) OR (Singapore[Title/Abstract])) OR (Thailand[Title/Abstract])) OR (Vietnam[Title/Abstract]) OR ("Southeast asia"[Title/Abstract])))

### Scopus

TITLE-ABS("hepatitis c" OR HCV) AND TITLE-ABS(genotype OR genotypes) AND TITLE-ABS(Brunei OR Cambodia OR "East Timor" OR Timor-Leste OR Indonesia OR Laos OR Malaysia OR Myanmar OR Philippines OR Singapore OR Thailand OR Vietnam OR "Southeast asia")

### ScienceDirect

("hepatitis c" OR HCV) (genotype or genotypes) (Brunei OR Cambodia OR "East Timor" OR Timor-Leste OR Indonesia OR Laos OR Malaysia OR Myanmar OR Philippines OR Singapore OR Thailand OR Vietnam OR "Southeast asia")

### Google Scholar

allintitle("hepatitis c" OR HCV) (genotype or genotypes) (Brunei OR Cambodia OR "East Timor" OR Timor-Leste OR Indonesia OR Laos OR Malaysia OR Myanmar OR Philippines OR Singapore OR Thailand OR Vietnam OR "Southeast asia")

### Web of Science

(TI="hepatitis c" OR TI=HCV) AND (TI=genotype OR TI=genotypes) AND (TI=Brunei OR TI=Cambodia OR TI="East Timor" OR TI=Timor-Leste OR TI=Indonesia OR TI=Laos OR TI=Malaysia OR TI=Myanmar OR TI=Philippines OR TI=Singapore OR TI=Thailand OR TI=Vietnam OR TI="Southeast asia")
